# Supplementary material for: Risk assessment of N‐nitrosamines in food
Source: PubMed Central journal article supplement (PMC10043641; doi:10.2903/j.efsa.2023.7884), 2023-03-28

Annex to: Risk assessment of N-nitrosamines in food  
doi:10.2903/j.efsa.2023.7884

© 2023 Wiley-VCH Verlag GmbH & Co. KGaA on behalf of the European Food Safety Authority.

## Annex B – BMD analyses

### Selection of the BMR

The BMR (benchmark response) used is an extra risk of 10% compared to the controls.

The BMD (benchmark dose) is the dose corresponding with the BMR of interest.

A 90% confidence interval around the BMD will be estimated, the lower bound is reported by BMDL and the upper bound by BMDU.

### Software Used

Results are obtained using the EFSA web-tool for BMD analysis, which uses the R-packag PROAST, version 70.0, for the underlying calculations.

### Specification of Deviations from Default Assumptions

#### Dose-response models

Default set of fitted models:

| Model        | Number of parameters | Formula                                              |
|--------------|----------------------|------------------------------------------------------|
| Null         | 1                    | $y = a$                                              |
| Full         | no. of groups        | $y = \text{group mean}$                              |
| Logistic     | 2                    | $y = 1 + \exp(-a - bx)$                              |
| Probit       | 2                    | $y = \text{pnorm}((x-a) \cdot b)$                    |
| Log-logistic | 3                    | $y = a + 1 - a \cdot \exp(c \cdot \log(bx))$         |
| Log-probit   | 3                    | $y = a + (1-a) \cdot \text{pnorm}(c \cdot \log(xb))$ |
| Weibull      | 3                    | $y = a + (1-a)(1 - \exp(-(xb)^c))$                   |
| Gamma        | 3                    | $y = \text{pgamma}(bx; c)$                           |
| Two-stage    | 3                    | $y = a + (1-a)(1 - \exp(-xb - c(xb)^2))$             |
| Exp model 3  | 3                    | $y = a \cdot \exp(bxd)$                              |
| Exp model 5  | 4                    | $y = a \cdot (c - (c-1) \exp(-bxd))$                 |
| Hill model 3 | 3                    | $y = a \cdot (1 - xdbd + xd)$                        |
| Hill model 5 | 4                    | $y = a \cdot (1 + (c-1)xdbd + xd)$                   |

For the Exp and Hill family, we fit models with 3 and 4 parameters as listed in the table. The 3-parameter model is selected if the difference in AIC is smaller than 5, otherwise the 4-parameter model is selected.

**Procedure for selection of BMDL**

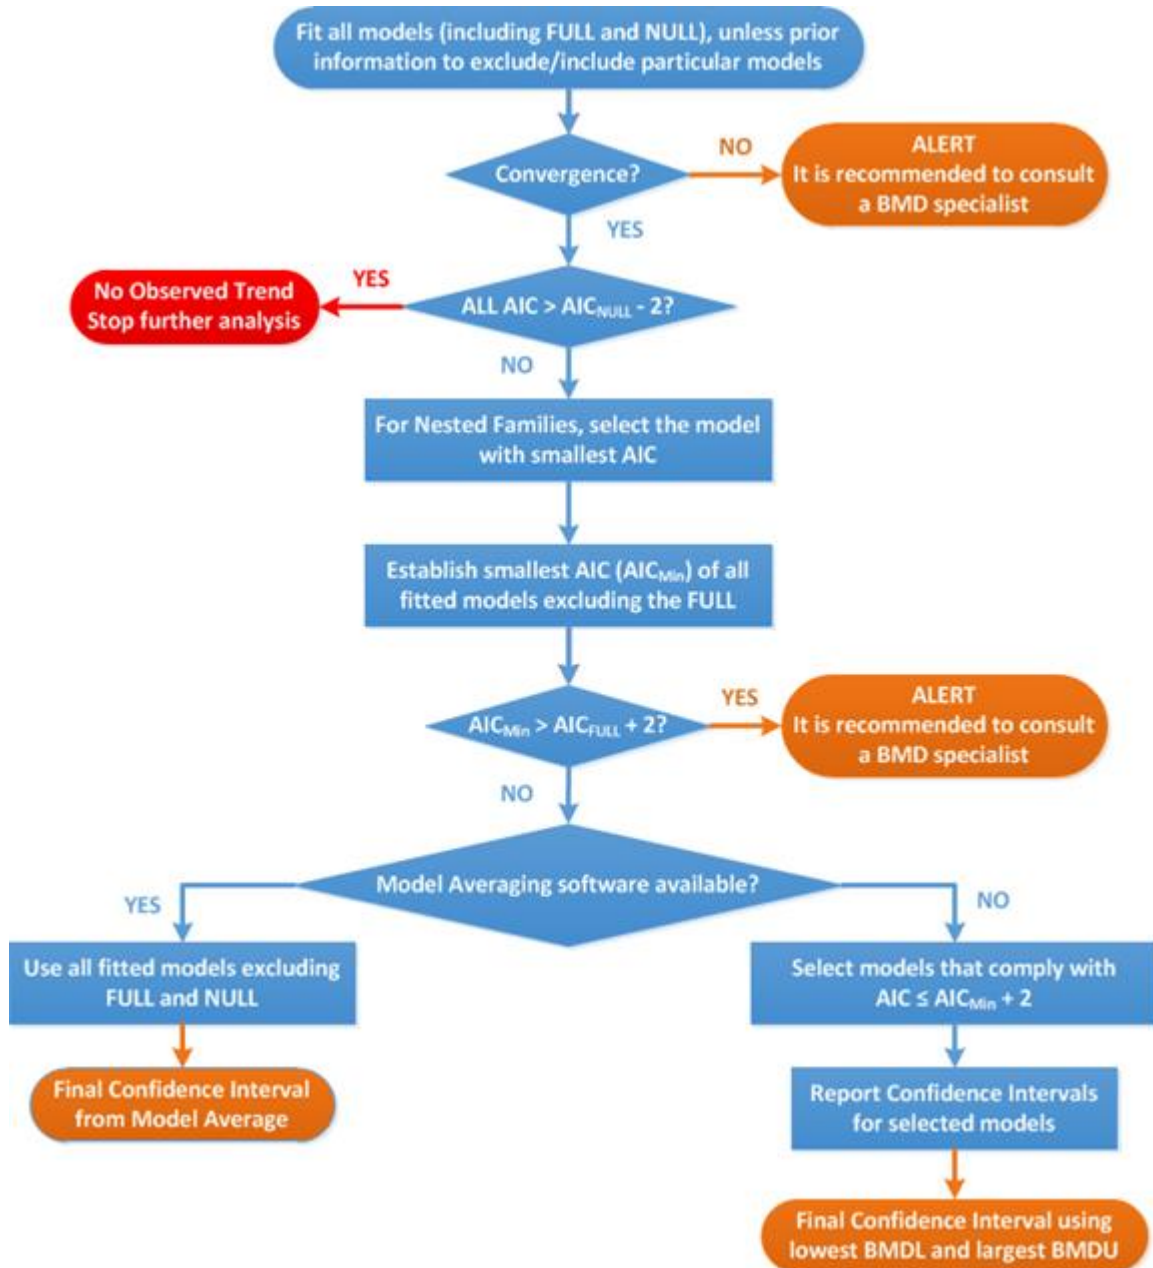

Flowchart for selection of BMDL

## B.1. NDMA

### B.1.1 Data description

The endpoint to be analyzed is animals with a liver tumour (malignant or non-malignant).

Data used for analysis:

| NDMA dose mg/kg bw per day | Number of. tumour cases | Animals (n) | Male (1)/female (2) |
|----------------------------|-------------------------|-------------|---------------------|
| 0.000                      | 16                      | 192         | 1                   |
| 0.002                      | 9                       | 48          | 1                   |
| 0.004                      | 10                      | 48          | 1                   |
| 0.008                      | 6                       | 48          | 1                   |
| 0.017                      | 8                       | 48          | 1                   |
| 0.030                      | 7                       | 48          | 1                   |
| 0.070                      | 12                      | 48          | 1                   |
| 0.100                      | 15                      | 48          | 1                   |
| 0.140                      | 23                      | 48          | 1                   |
| 0.170                      | 33                      | 48          | 1                   |
| 0.200                      | 38                      | 48          | 1                   |
| 0.270                      | 38                      | 48          | 1                   |
| 0.340                      | 44                      | 48          | 1                   |
| 0.410                      | 47                      | 48          | 1                   |
| 0.540                      | 48                      | 48          | 1                   |
| 0.000                      | 28                      | 192         | 2                   |
| 0.003                      | 12                      | 48          | 2                   |
| 0.006                      | 10                      | 48          | 2                   |
| 0.011                      | 9                       | 48          | 2                   |
| 0.020                      | 13                      | 48          | 2                   |
| 0.050                      | 14                      | 48          | 2                   |
| 0.090                      | 21                      | 48          | 2                   |
| 0.140                      | 38                      | 48          | 2                   |
| 0.180                      | 38                      | 48          | 2                   |
| 0.230                      | 46                      | 48          | 2                   |
| 0.280                      | 47                      | 48          | 2                   |
| 0.360                      | 48                      | 48          | 2                   |
| 0.460                      | 46                      | 48          | 2                   |
| 0.550                      | 47                      | 48          | 2                   |
| 0.730                      | 44                      | 48          | 2                   |

### Final BMD Values

| subgroup       | BMDL         | BMDU          |
|----------------|--------------|---------------|
| Males          | 0.05         | 0.0863        |
| <b>Females</b> | <b>0.035</b> | <b>0.0625</b> |

Confidence intervals for the BMD are based on 200 bootstrap data sets.

### Fitted Models

| model                    | No.par   | loglik         | AIC            | accepted   | BMDL          | BMDU          | BMD            | sens.subgr | conv       |
|--------------------------|----------|----------------|----------------|------------|---------------|---------------|----------------|------------|------------|
| null                     | 2        | -1252.25       | 2508.50        |            | NA            | NA            | NA             |            | NA         |
| full                     | 32       | -717.39        | 1498.78        |            | NA            | NA            | NA             |            | NA         |
| two.stage-a              | 4        | -811.29        | 1630.58        | no         | NA            | NA            | 0.02060        | --         | yes        |
| log.logist-ab            | 5        | -767.20        | 1544.40        | no         | NA            | NA            | 0.02950        | 2          | yes        |
| Weibull-ab               | 5        | -796.75        | 1603.50        | no         | NA            | NA            | 0.00683        | 2          | yes        |
| log.prob-ab              | 5        | -778.02        | 1566.04        | no         | NA            | NA            | 0.02390        | 2          | yes        |
| gamma-a                  | 4        | -804.25        | 1616.50        | no         | NA            | NA            | 0.00787        | --         | yes        |
| <b>LVM: Expon. m5-ab</b> | <b>6</b> | <b>-739.98</b> | <b>1491.96</b> | <b>yes</b> | <b>0.0337</b> | <b>0.0571</b> | <b>0.04460</b> | <b>2</b>   | <b>yes</b> |
| <b>LVM: Hill m5-ab</b>   | <b>6</b> | <b>-742.34</b> | <b>1496.68</b> | <b>no</b>  | <b>NA</b>     | <b>NA</b>     | <b>0.05660</b> | <b>2</b>   | <b>yes</b> |

## **Estimated Model Parameters**

### **two.stage**

estimate for a-1 : 0.09998

estimate for a-2 : 0.1834

estimate for BMD- : 0.02059

estimate for c : 1e-06

### **log.logist**

estimate for a-1 : 0.1166

estimate for a-2 : 0.1735

estimate for BMD-1 : 0.04088

estimate for BMD-2 : 0.02947

estimate for c : 1.831

### **Weibull**

estimate for a-1 : 0.07902

estimate for a-2 : 0.1424

estimate for BMD-1 : 0.008488

estimate for BMD-2 : 0.006831

estimate for c : 0.735

### **log.prob**

estimate for a-1 : 0.1139

estimate for a-2 : 0.1727

estimate for BMD-1 : 0.03234

estimate for BMD-2 : 0.02387

estimate for c : 0.9281

### **gamma**

estimate for a-1 : 0.07585

estimate for a-2 : 0.1553

estimate for BMD- : 0.007872

estimate for c : 0.6609

### **EXP**

estimate for a-1 : 1.32

estimate for a-2 : 1.264

estimate for BMD-1 : 0.06431

estimate for BMD-2 : 0.04456

estimate for c- : 0.5146

estimate for d- : 1.825

estimate for th(fixed) : 0

estimate for sigma(fixed) : 0.25

**HILL**

estimate for a-1 : 1.311

estimate for a-2 : 1.254

estimate for BMD-1 : 0.07869

estimate for BMD-2 : 0.05661

estimate for c- : 0.5153

estimate for d- : 2.903

estimate for th(fixed) : 0

estimate for sigma(fixed) : 0.25

**Weights for Model Averaging**

| two.stage | log.logist | Weibull | log.prob | gamma | EXP  | HILL |
|-----------|------------|---------|----------|-------|------|------|
| 0         | 0          | 0       | 0        | 0     | 0.91 | 0.09 |

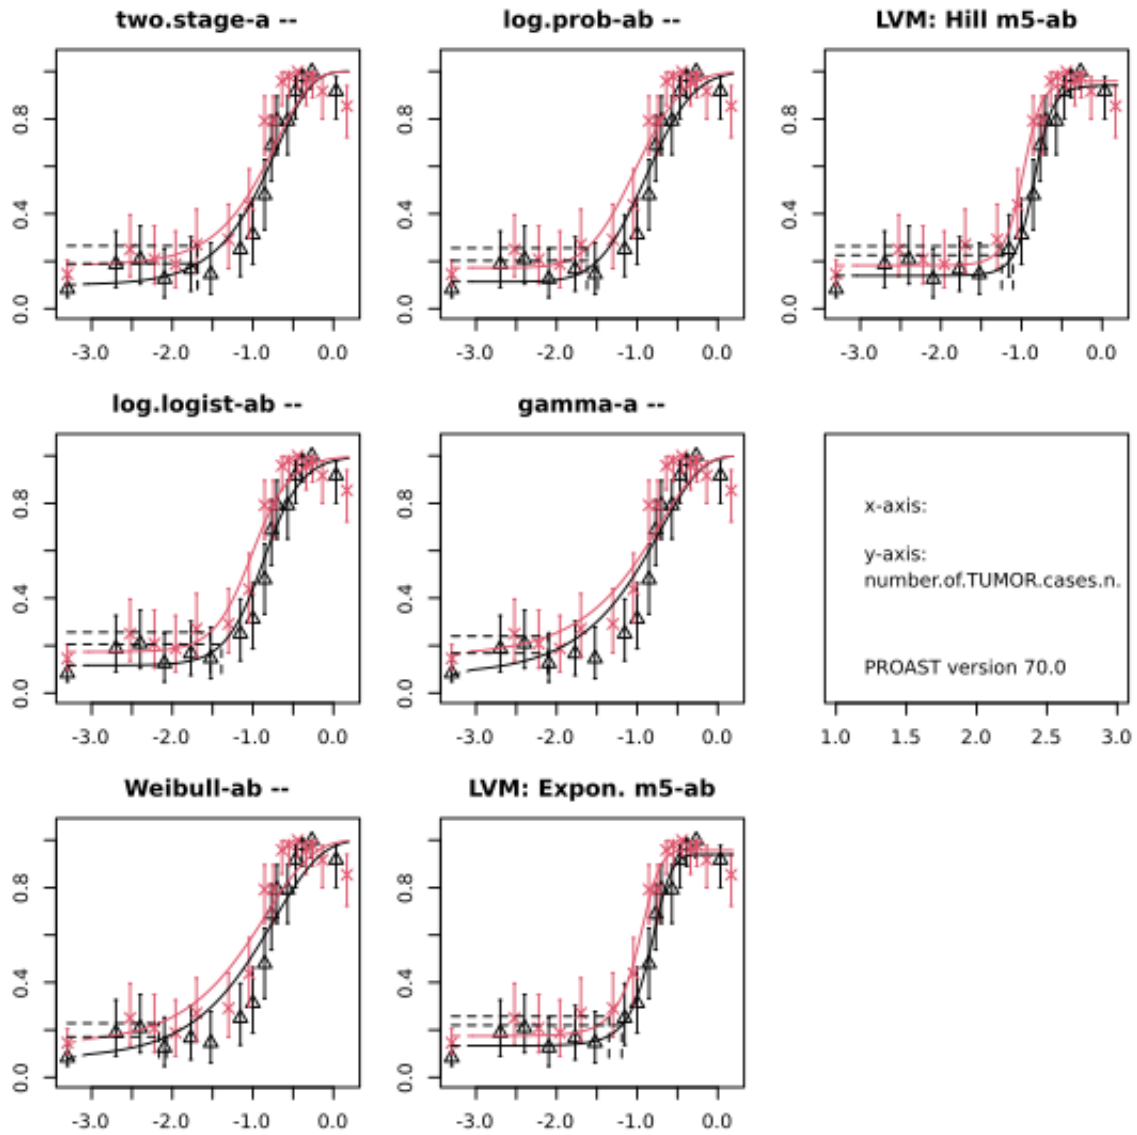

**BMD confidence intervals based on MA**

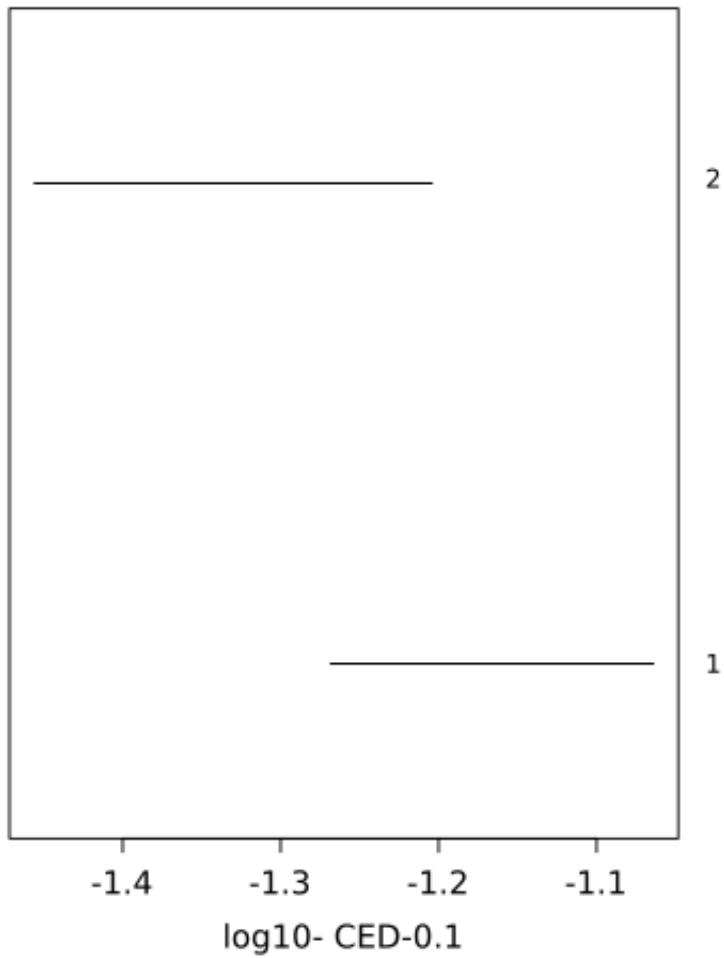



### bootstrap curves based on model averaging

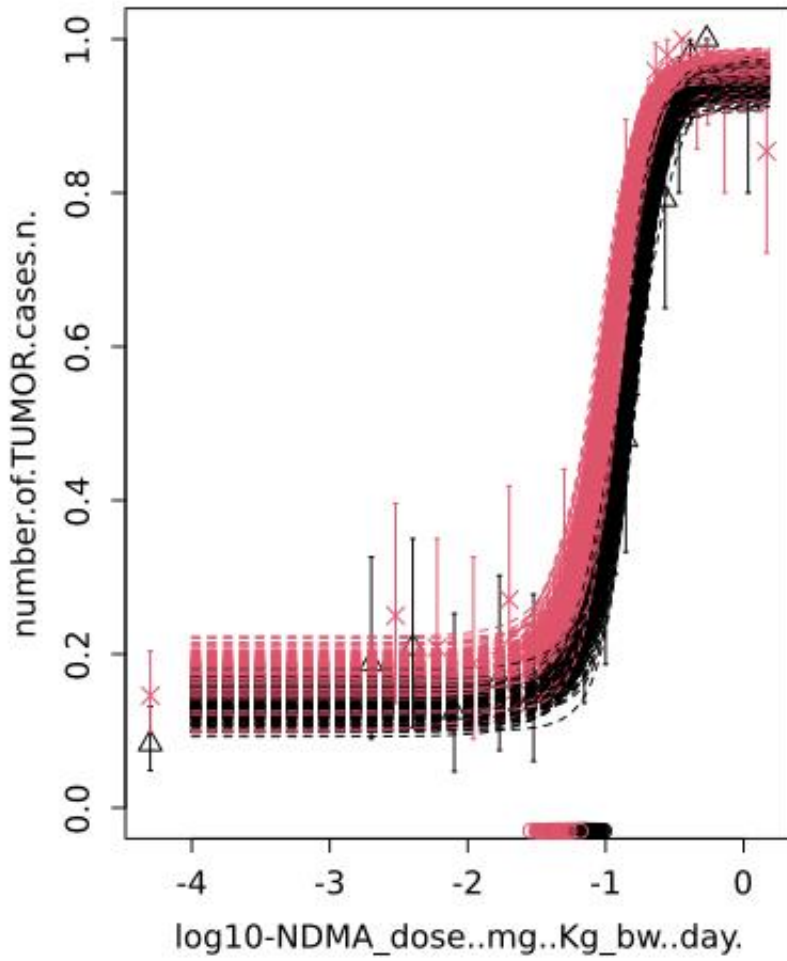

version: 70.0  
model averaging results  
dtype 4  
selected all  
dose scaling: 1  
conf level: 0.9  
number of runs: 200  
extra risk 0.1  
BMD CI  
0.054 0.0863  
0.035 0.0625

## B.2. NDEA

### B.2.1 Brantom 1983:

#### Data Description

The endpoint to be analyzed is animals with a liver tumour (malignant or non-malignant).

Data used for analysis:

| NDEA dose Mg/kg bw per day | Number of tumour cases | Animals (n) | Male (1) Female (2) |
|----------------------------|------------------------|-------------|---------------------|
| 0.000                      | 15                     | 192         | 1                   |
| 0.002                      | 5                      | 48          | 1                   |
| 0.004                      | 4                      | 48          | 1                   |
| 0.008                      | 10                     | 48          | 1                   |
| 0.017                      | 3                      | 48          | 1                   |
| 0.030                      | 10                     | 48          | 1                   |
| 0.070                      | 19                     | 48          | 1                   |
| 0.100                      | 28                     | 48          | 1                   |
| 0.140                      | 19                     | 48          | 1                   |
| 0.170                      | 29                     | 48          | 1                   |
| 0.200                      | 26                     | 48          | 1                   |
| 0.270                      | 31                     | 48          | 1                   |
| 0.340                      | 28                     | 48          | 1                   |
| 0.410                      | 32                     | 48          | 1                   |
| 0.540                      | 28                     | 48          | 1                   |
| 1.080                      | 39                     | 48          | 1                   |
| 0.000                      | 27                     | 192         | 2                   |
| 0.003                      | 10                     | 48          | 2                   |
| 0.006                      | 9                      | 48          | 2                   |
| 0.011                      | 5                      | 48          | 2                   |
| 0.020                      | 15                     | 48          | 2                   |
| 0.050                      | 19                     | 48          | 2                   |
| 0.090                      | 37                     | 48          | 2                   |
| 0.140                      | 42                     | 48          | 2                   |
| 0.180                      | 42                     | 48          | 2                   |
| 0.230                      | 44                     | 48          | 2                   |
| 0.280                      | 45                     | 48          | 2                   |
| 0.360                      | 46                     | 48          | 2                   |

|       |    |    |   |
|-------|----|----|---|
| 0.460 | 38 | 48 | 2 |
| 0.550 | 44 | 48 | 2 |
| 0.730 | 46 | 48 | 2 |
| 1.470 | 45 | 48 | 2 |

### B.2.1.1 Results for all doses

#### Final BMD Values

| subgroup | BMDL          | BMDU          |
|----------|---------------|---------------|
| 1        | 0.019         | 0.0376        |
| 2        | <b>0.0099</b> | <b>0.0211</b> |

Confidence intervals for the BMD are based on 200 bootstrap data sets.

#### Fitted Models

| model                 | No.par   | loglik         | AIC            | accepted   | BMDL           | BMDU         | BMD            | sens.sub<br>gr | conv       |
|-----------------------|----------|----------------|----------------|------------|----------------|--------------|----------------|----------------|------------|
| null                  | 2        | -1219.32       | 2442.64        |            | NA             | NA           | NA             |                | NA         |
| full                  | 32       | -812.23        | 1688.46        |            | NA             | NA           | NA             |                | NA         |
| two.stage-ab          | 5        | -891.98        | 1793.96        | no         | NA             | NA           | 0.01760        | 2              | yes        |
| log.logist-b          | 4        | -846.36        | 1700.72        | no         | NA             | NA           | 0.00561        | 2              | yes        |
| Weibull-ab            | 5        | -854.47        | 1718.94        | no         | NA             | NA           | 0.00239        | 2              | yes        |
| log.prob-b            | 4        | -847.47        | 1702.94        | no         | NA             | NA           | 0.00564        | 2              | yes        |
| gamma-ab              | 5        | -862.07        | 1734.14        | no         | NA             | NA           | 0.00188        | 2              | yes        |
| <b>LVM:xpon. m5-a</b> | <b>5</b> | <b>-844.08</b> | <b>1698.16</b> | <b>no</b>  | <b>NA</b>      | <b>NA</b>    | <b>0.01320</b> | <b>2</b>       | <b>yes</b> |
| <b>LVM: Hill m5-a</b> | <b>5</b> | <b>-842.92</b> | <b>1695.84</b> | <b>yes</b> | <b>0.00928</b> | <b>0.026</b> | <b>0.01630</b> | <b>2</b>       | <b>yes</b> |

Attention: the AIC of the best model (minimum AIC) is more than two units larger than that of the full model. This might indicate a problem in the data, in particular when the difference is much larger than two units (e.g.  $> 5$ ). You might check the following options:

1. In real-life studies, not all experimental factors are completely randomized over all animals (experimental units), e.g. animals were housed in the same cage within a given dose group, or order of treatments were not randomized over individual animals. Another option is that individual outlying animals distort the mean response of one or more treatment groups. This may lead to fluctuations in the (mean) responses among treatment groups that are larger than expected from random sampling error, resulting in an AIC difference with the full model larger than 2 units.
2. the data consist of subgroups not taken into account in the model (e.g. various studies, or two sexes)
3. the data contain litter effects not taken into account
4. the response in the top dose group deviates substantially from the fitted model (check the CI around the observed (mean) response);

Associated actions for each of these four options are:

1. the greater scatter in (mean) responses will result in a wider BMD CI; normally, no further action is needed, as the BMD approach is relatively robust to such deviations. You might check this by leaving out specific treatment groups (one by one) and check if this has a major impact on the BMD CI.
2. use the factor defining the subgroups as a covariate and re-analyse the data
3. re-analyse the data with litter effects taken into account
4. consider to leave out the top dose; it is not recommended to leave out two high dose groups.

## **Estimated Model Parameters**

### **two.stage**

estimate for a-1 : 0.1203

estimate for a-2 : 0.1737

estimate for BMD-1 : 0.04335

estimate for BMD-2 : 0.01759

estimate for c : 1e-06

### **log.logist**

estimate for a- : 0.1053

estimate for BMD-1 : 0.02498

estimate for BMD-2 : 0.005606

estimate for c : 1.014

### **Weibull**

estimate for a-1 : 0.0722

estimate for a-2 : 0.1162

estimate for BMD-1 : 0.009227

estimate for BMD-2 : 0.00239

estimate for c : 0.593

### **log.prob**

estimate for a- : 0.1068

estimate for BMD-1 : 0.025

estimate for BMD-2 : 0.005638

estimate for c : 0.5905

### **gamma**

estimate for a-1 : 0.06916

estimate for a-2 : 0.1203

estimate for BMD-1 : 0.00644

estimate for BMD-2 : 0.001882

estimate for c : 0.4654

### **EXP**

estimate for a-1 : 1.489

estimate for BMD-1 : 0.02687

estimate for BMD-2 : 0.0132

estimate for c- : 0.588

estimate for d- : 1.087

estimate for th(fixed) : 0

estimate for sigma(fixed) : 0.25

**HILL**

estimate for a-1 : 1.478

estimate for BMD-1 : 0.02843

estimate for BMD-2 : 0.01633

estimate for c- : 0.5752

estimate for d- : 1.51

estimate for th(fixed) : 0

estimate for sigma(fixed) : 0.25

**Weights for Model Averaging**

| two.stage | log.logist | Weibull | log.prob | gamma | EXP  | HILL |
|-----------|------------|---------|----------|-------|------|------|
| 0         | 0.06       | 0       | 0.02     | 0     | 0.22 | 0.7  |

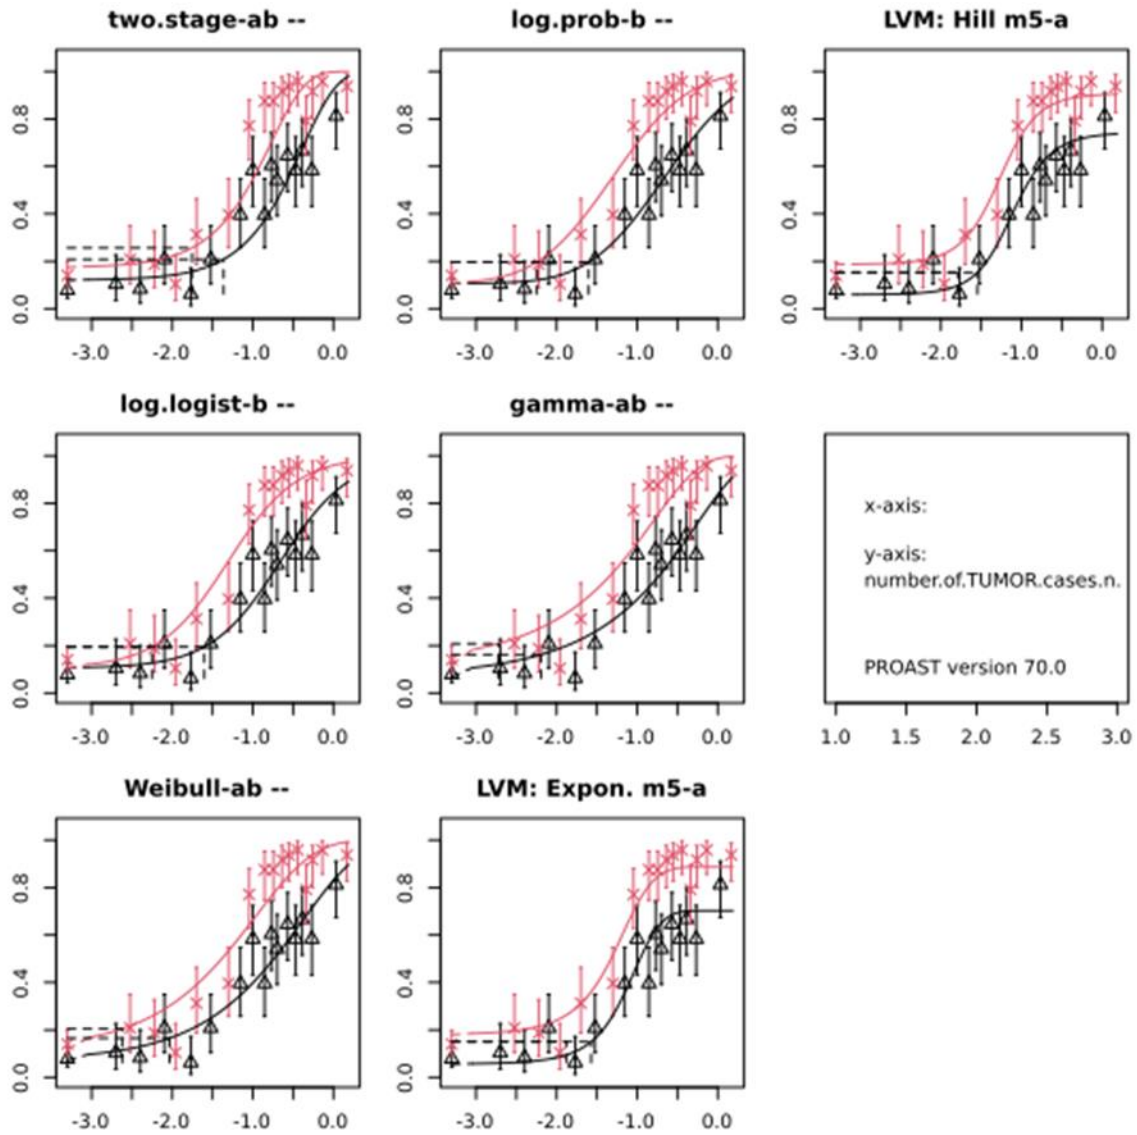

**BMD confidence intervals based on MA**

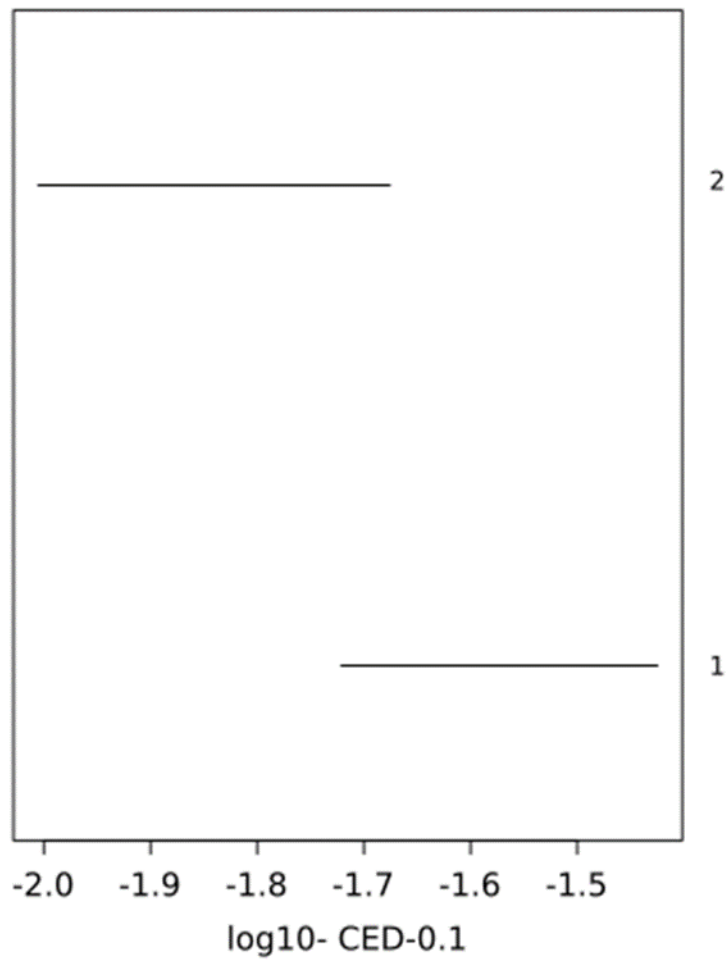



### bootstrap curves based on model averaging

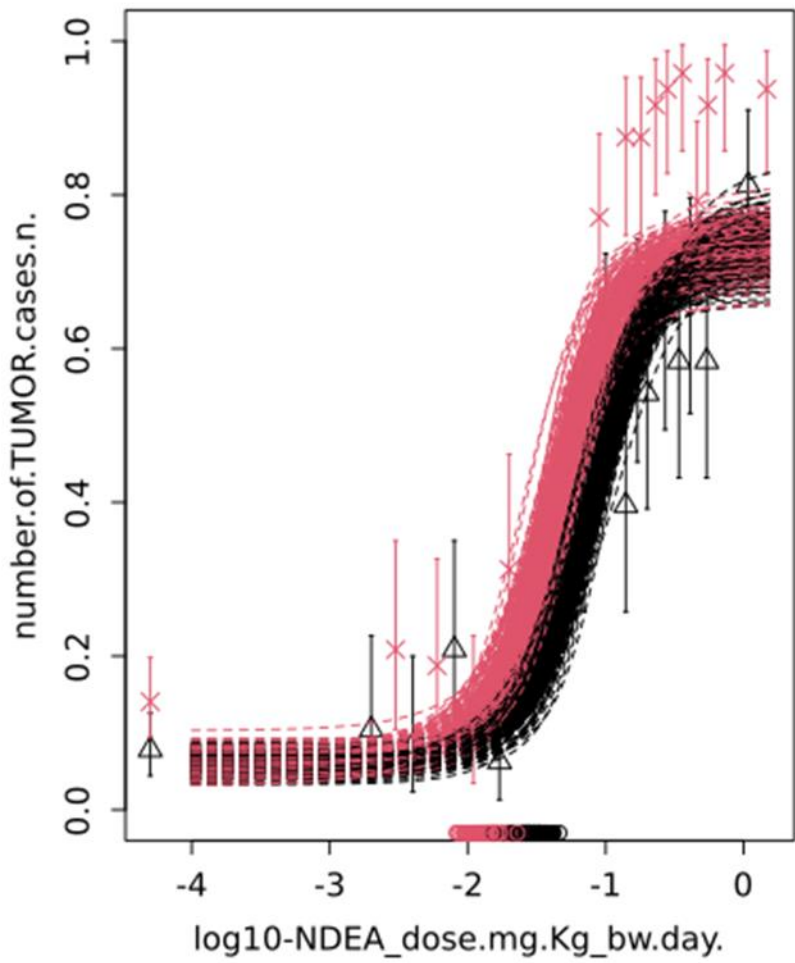

version: 70.0  
model averaging results  
dtype 4  
selected all  
dose scaling: 1  
conf level: 0.9  
number of runs: 200  
extra risk 0.1  
BMD CI  
0.019 0.0376  
0.0099 0.0211

### B.2.1.2 Results for the first 5 doses

#### Final BMD Values

| subgroup | BMDL   | BMDU   |
|----------|--------|--------|
| 1        | 0.012  | 0.0459 |
| 2        | 0.0086 | 0.034  |

Confidence intervals for the BMD are based on 200 bootstrap data sets.

#### Response variable: R

#### Fitted Models

| model            | No.par | loglik  | AIC    | accepted | BMDL    | BMDU   | BMD    | sens.su<br>bgr | conv |
|------------------|--------|---------|--------|----------|---------|--------|--------|----------------|------|
| null             | 2      | -362.82 | 729.64 |          | NA      | NA     | NA     |                | NA   |
| full             | 12     | -346.57 | 717.14 |          | NA      | NA     | NA     |                | NA   |
| two.stage-a      | 4      | -353.12 | 714.24 | yes      | 0.01290 | 0.0339 | 0.0216 | --             | yes  |
| log.logist-a     | 4      | -353.32 | 714.64 | yes      | 0.00916 | 0.0349 | 0.0205 | --             | yes  |
| Weibull-a        | 4      | -353.25 | 714.50 | yes      | 0.00924 | 0.0348 | 0.0204 | --             | yes  |
| log.prob-a       | 4      | -353.56 | 715.12 | yes      | 0.00858 | 0.0353 | 0.0205 | --             | yes  |
| gamma-a          | 4      | -353.27 | 714.54 | yes      | 0.00910 | 0.0344 | 0.0199 | --             | yes  |
| LVM: Expon. m3-a | 4      | -352.72 | 713.44 | yes      | 0.00511 | 0.0307 | 0.0156 | 2              | yes  |
| LVM: Hill m3-a   | 4      | -352.72 | 713.44 | yes      | 0.00511 | 0.0307 | 0.0156 | 2              | yes  |

## **Estimated Model Parameters**

### **two.stage**

estimate for a-1 : 0.0829

estimate for a-2 : 0.1522

estimate for BMD- : 0.0216

estimate for c : 4.068

### **log.logist**

estimate for a-1 : 0.08305

estimate for a-2 : 0.1529

estimate for BMD- : 0.02053

estimate for c : 1.281

### **Weibull**

estimate for a-1 : 0.08233

estimate for a-2 : 0.1521

estimate for BMD- : 0.02041

estimate for c : 1.178

### **log.prob**

estimate for a-1 : 0.08478

estimate for a-2 : 0.1547

estimate for BMD- : 0.02046

estimate for c : 0.6752

### **gamma**

estimate for a-1 : 0.08152

estimate for a-2 : 0.1515

estimate for BMD- : 0.01987

estimate for c : 1.15

### **EXP**

estimate for a-1 : 1.416

estimate for BMD-1 : 0.02413

estimate for BMD-2 : 0.01557

estimate for d- : 0.7691

estimate for th(fixed) : 0

estimate for sigma(fixed) : 0.25

### **HILL**

estimate for a-1 : 1.416

estimate for BMD-1 : 0.02413

estimate for BMD-2 : 0.01557

estimate for d- : 0.7702

estimate for th(fixed) : 0

estimate for sigma(fixed) : 0.25

**Weights for Model Averaging**

| two.stage | log.logist | Weibull | log.prob | gamma | EXP  | HILL |
|-----------|------------|---------|----------|-------|------|------|
| 0.14      | 0.11       | 0.12    | 0.09     | 0.12  | 0.21 | 0.21 |

### Visualization

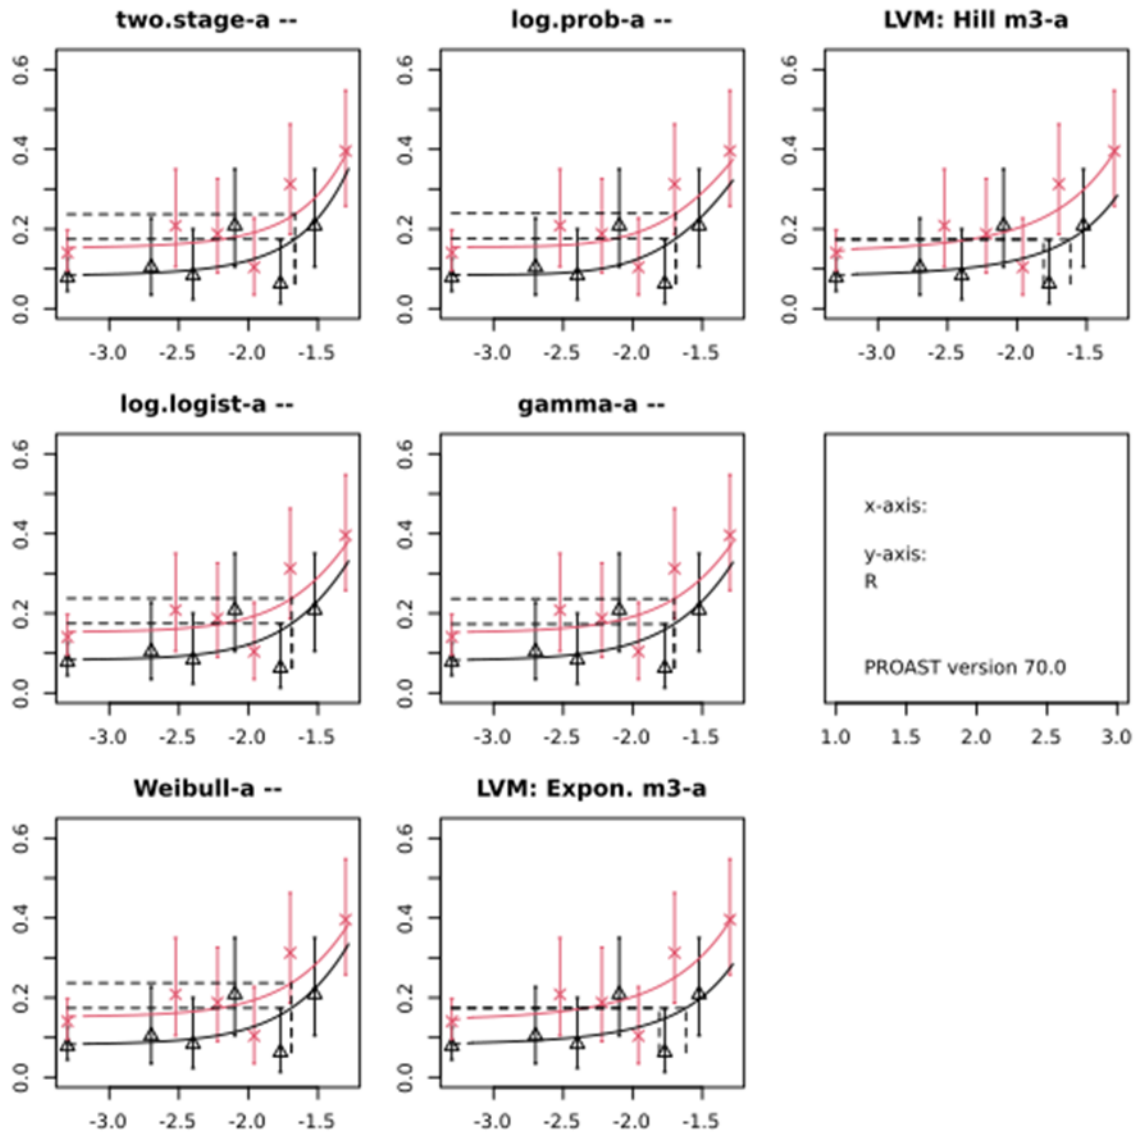

**BMD confidence intervals based on MA**

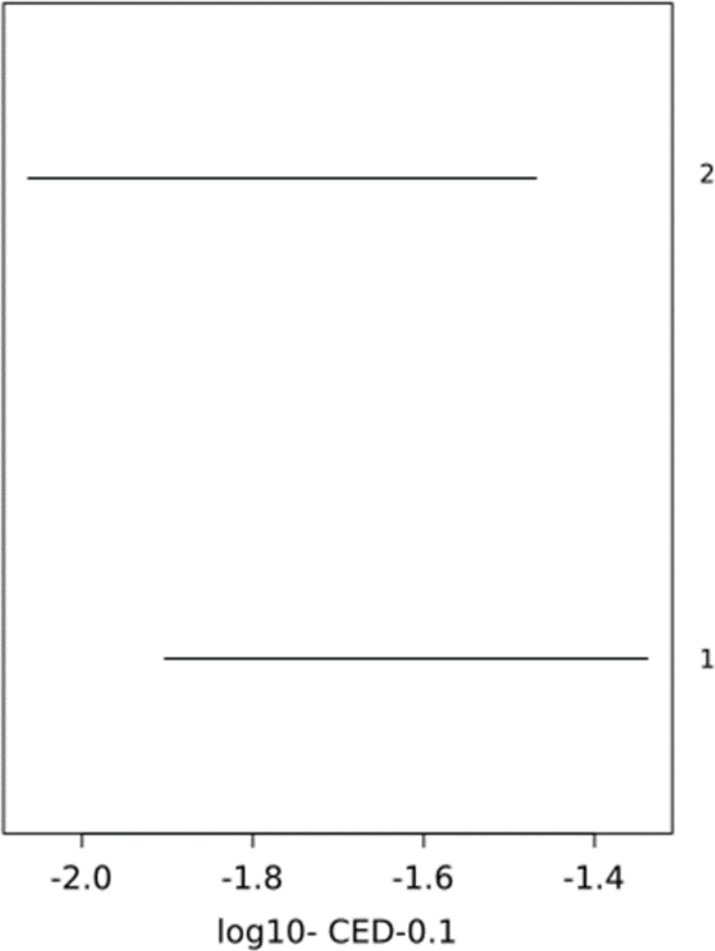

### bootstrap curves based on model averaging

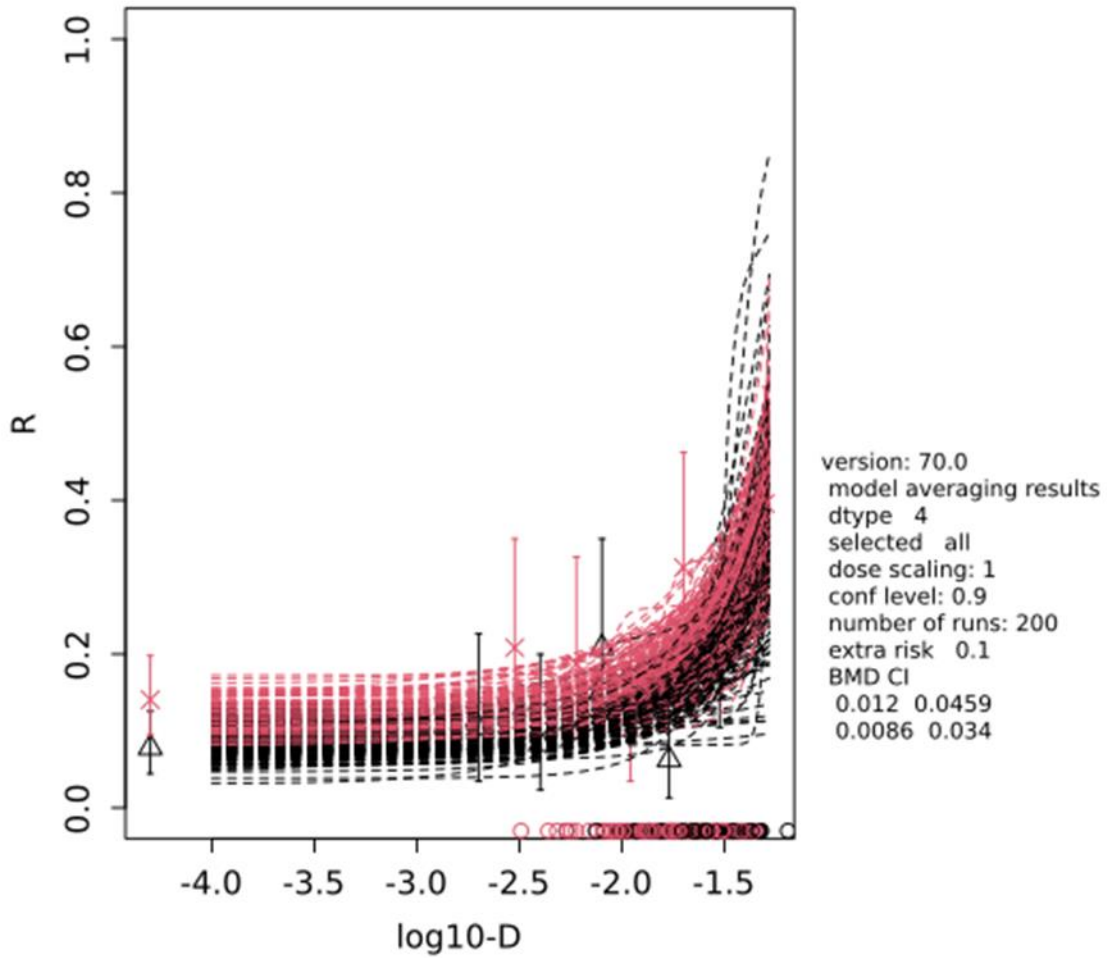

## B.2.2 Berger et al, 1987

### Data Description

The endpoint to be analyzed is: any liver tumour

Data used for analysis:

| <b>NDEA dose<br/>mg/kg bw per day</b> | <b>Number of animals with<br/>any liver tumour</b> | <b>Total number<br/>of animals</b> |
|---------------------------------------|----------------------------------------------------|------------------------------------|
| 0.000                                 | 3                                                  | 500                                |
| 0.007                                 | 2                                                  | 80                                 |
| 0.023                                 | 3                                                  | 80                                 |
| 0.070                                 | 36                                                 | 80                                 |

#### B.2.2.1 Results

| subgroup | <b>BMDL</b>  | <b>BMDU</b>   |
|----------|--------------|---------------|
| all      | <b>0.028</b> | <b>0.0536</b> |

#### Fitted Models

| model                            | No.par   | loglik        | AIC           | accepted   | BMDL          | BMDU          | BMD           | conv       |
|----------------------------------|----------|---------------|---------------|------------|---------------|---------------|---------------|------------|
| null                             | 1        | -166.85       | 335.70        |            | NA            | NA            | NA            | NA         |
| full                             | 4        | -95.54        | 199.08        |            | NA            | NA            | NA            | NA         |
| two.stage                        | 3        | -96.60        | 199.20        | yes        | 0.0233        | 0.0349        | 0.0303        | no         |
| log.logist                       | 3        | -96.43        | 198.86        | yes        | 0.0241        | 0.0468        | 0.0343        | yes        |
| Weibull                          | 3        | -96.37        | 198.74        | yes        | 0.0241        | 0.0478        | 0.0346        | yes        |
| log.prob                         | 3        | -96.58        | 199.16        | yes        | 0.0249        | 0.0437        | 0.0337        | yes        |
| gamma                            | 3        | -96.50        | 199.00        | yes        | 0.0238        | 0.0451        | 0.0342        | yes        |
| <b>LVM:Expon. m<sup>3</sup>-</b> | <b>3</b> | <b>-95.98</b> | <b>197.96</b> | <b>yes</b> | <b>0.0254</b> | <b>0.0503</b> | <b>0.0360</b> | <b>yes</b> |
| <b>LVM:Hill m<sup>3</sup>-</b>   | <b>3</b> | <b>-95.98</b> | <b>197.96</b> | <b>yes</b> | <b>0.0253</b> | <b>0.0503</b> | <b>0.0359</b> | <b>yes</b> |



**Estimated Model Parameters**

two.stage

estimate for a- : 0.006691

estimate for BMD- : 0.03027

estimate for c : 61330000

**log.logist**

estimate for a- : 0.00797

estimate for BMD- : 0.03428

estimate for c : 2.757

**Weibull**

estimate for a- : 0.007694

estimate for BMD- : 0.03463

estimate for c : 2.436

**log.prob**

estimate for a- : 0.008562

estimate for BMD- : 0.03374

estimate for c : 1.566

**gamma**

estimate for a- : 0.008192

estimate for BMD- : 0.03425

estimate for c : 3.587

**EXP**

estimate for a- : 1.853

estimate for BMD- : 0.03596

estimate for d- : 0.9808

estimate for th(fixed) : 0

estimate for sigma(fixed) : 0.25

**HILL**

estimate for a- : 1.853

estimate for BMD- : 0.03594

estimate for d- : 0.9852

estimate for th(fixed) : 0

estimate for sigma(fixed) : 0.25

**Weights for Model Averaging**

| two.stage | log.logist | Weibull | log.prob | gamma | EXP | HILL |
|-----------|------------|---------|----------|-------|-----|------|
| 0.11      | 0.13       | 0.14    | 0.11     | 0.12  | 0.2 | 0.2  |

### Visualisation

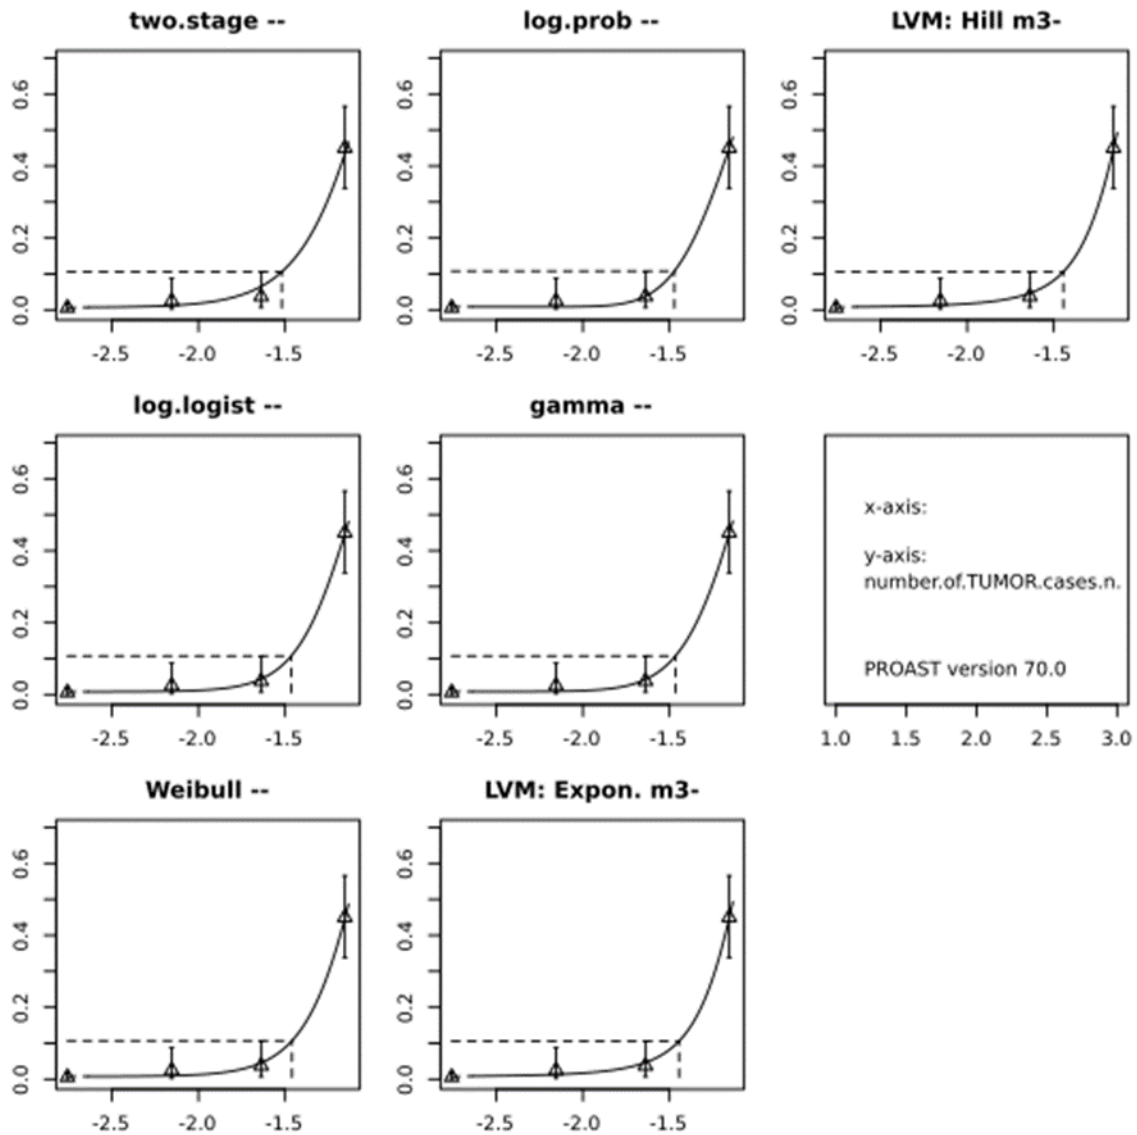

### bootstrap curves based on model averaging

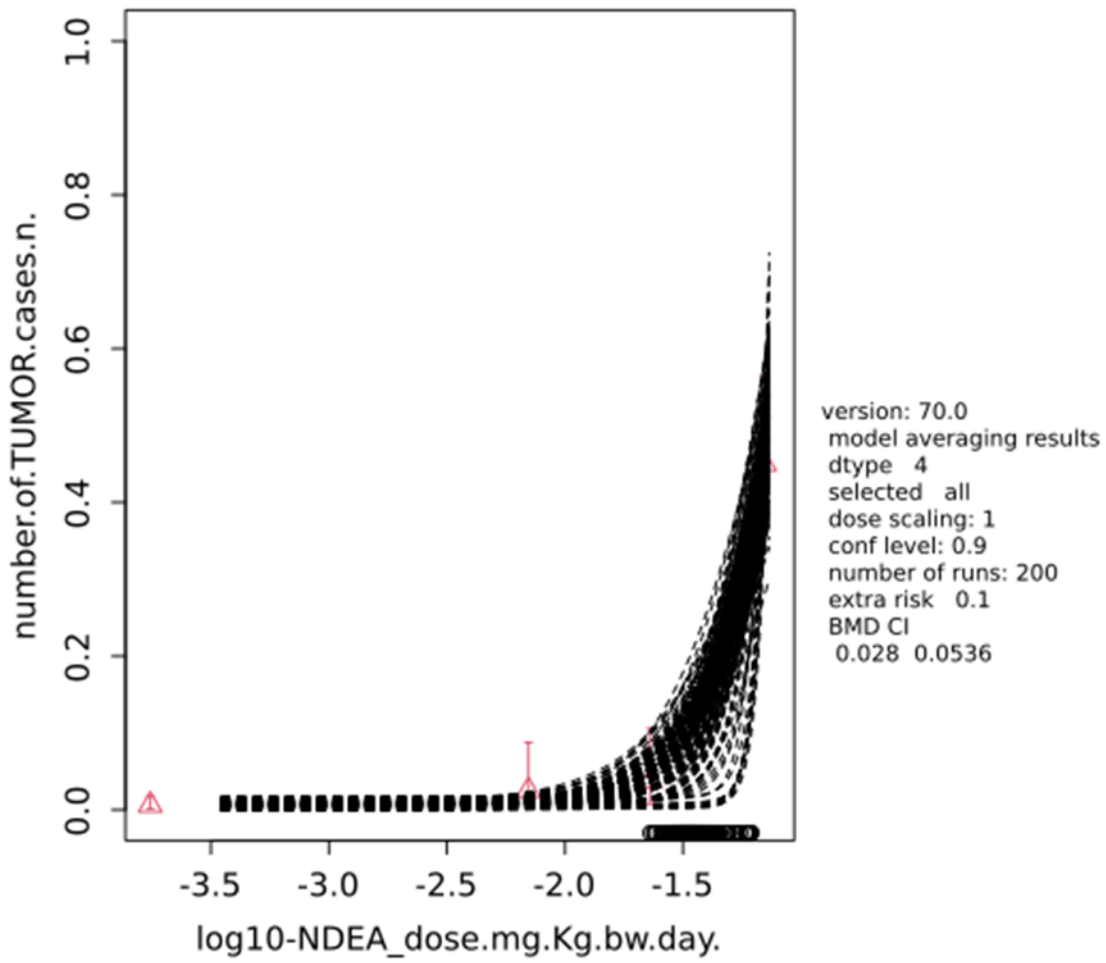

## B.3. NMOR

### Data Description

The endpoint to be analyzed is animal with any liver tumour.

Data used for analysis:

| NMOR dose<br>mg/kg bw per day | Number of animals<br>with<br>any liver tumour | Total number<br>of animals |
|-------------------------------|-----------------------------------------------|----------------------------|
| 0                             | 1                                             | 100                        |
| 0.003                         | 6                                             | 100                        |
| 0.006                         | 5                                             | 100                        |
| 0.016                         | 7                                             | 48                         |
| 0.039                         | 9                                             | 48                         |
| 0.093                         | 22                                            | 48                         |
| 0.229                         | 23                                            | 24                         |

### Results

#### Final BMD Values

| Subgroup | BMDL         | BMDU          |
|----------|--------------|---------------|
| all      | <b>0.014</b> | <b>0.0376</b> |

Confidence intervals for the BMD are based on 200 bootstrap data sets.

#### Fitted Models

| Model           | No.par | loglik  | AIC    | accepted | BMDL   | BMDU   | BMD    | conv |
|-----------------|--------|---------|--------|----------|--------|--------|--------|------|
| null            | 1      | -202.62 | 407.24 |          | NA     | NA     | NA     | NA   |
| full            | 7      | -128.51 | 271.02 |          | NA     | NA     | NA     | NA   |
| two.stage       | 3      | -130.71 | 267.42 | yes      | 0.0133 | 0.0340 | 0.0207 | yes  |
| log.logist      | 3      | -133.80 | 273.60 | no       | NA     | NA     | 0.0268 | yes  |
| Weibull         | 3      | -131.75 | 269.50 | no       | NA     | NA     | 0.0226 | yes  |
| log.prob        | 3      | -134.42 | 274.84 | no       | NA     | NA     | 0.0278 | yes  |
| gamma           | 3      | -132.20 | 270.40 | no       | NA     | NA     | 0.0195 | yes  |
| LVM: Expon. m3- | 3      | -130.48 | 266.96 | yes      | 0.0119 | 0.0341 | 0.0206 | yes  |
| LVM: Hill m3-   | 3      | -130.50 | 267.00 | yes      | 0.0119 | 0.0342 | 0.0206 | yes  |

## **Estimated Model Parameters**

### **two.stage**

estimate for a- : 0.02566

estimate for BMD- : 0.02067

estimate for c : 1.492

### **log.logist**

estimate for a- : 0.04051

estimate for BMD- : 0.02678

estimate for c : 1.801

### **Weibull**

estimate for a- : 0.0322

estimate for BMD- : 0.02256

estimate for c : 1.333

### **log.prob**

estimate for a- : 0.04491

estimate for BMD- : 0.02778

estimate for c : 1.092

### **gamma**

estimate for a- : 0.02798

estimate for BMD- : 0.01948

estimate for c : 1.307

### **EXP**

estimate for a- : 1.644

estimate for BMD- : 0.02059

estimate for d- : 0.5948

estimate for th(fixed) : 0

estimate for sigma(fixed) : 0.25

### **HILL**

estimate for a- : 1.643

estimate for BMD- : 0.02064

estimate for d- : 0.599

estimate for th(fixed) : 0

estimate for sigma(fixed) : 0.25

**Weights for Model Averaging**

| two.stage | log.logist | Weibull | log.prob | gamma | EXP | HILL |
|-----------|------------|---------|----------|-------|-----|------|
| 0.24      | 0.01       | 0.09    | 0.01     | 0.05  | 0.3 | 0.3  |

### Visualisation

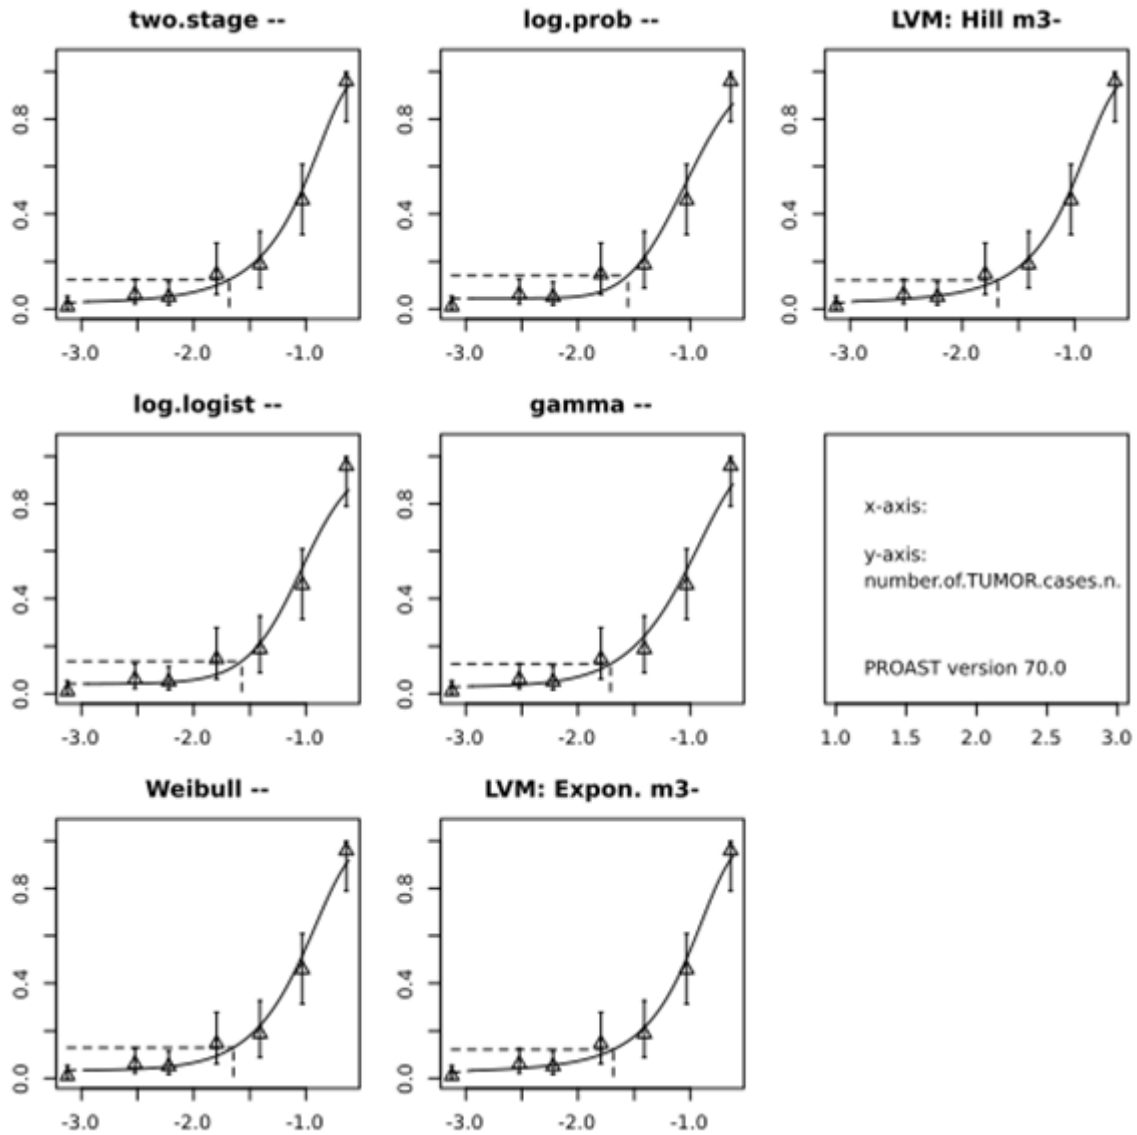



### bootstrap curves based on model averaging

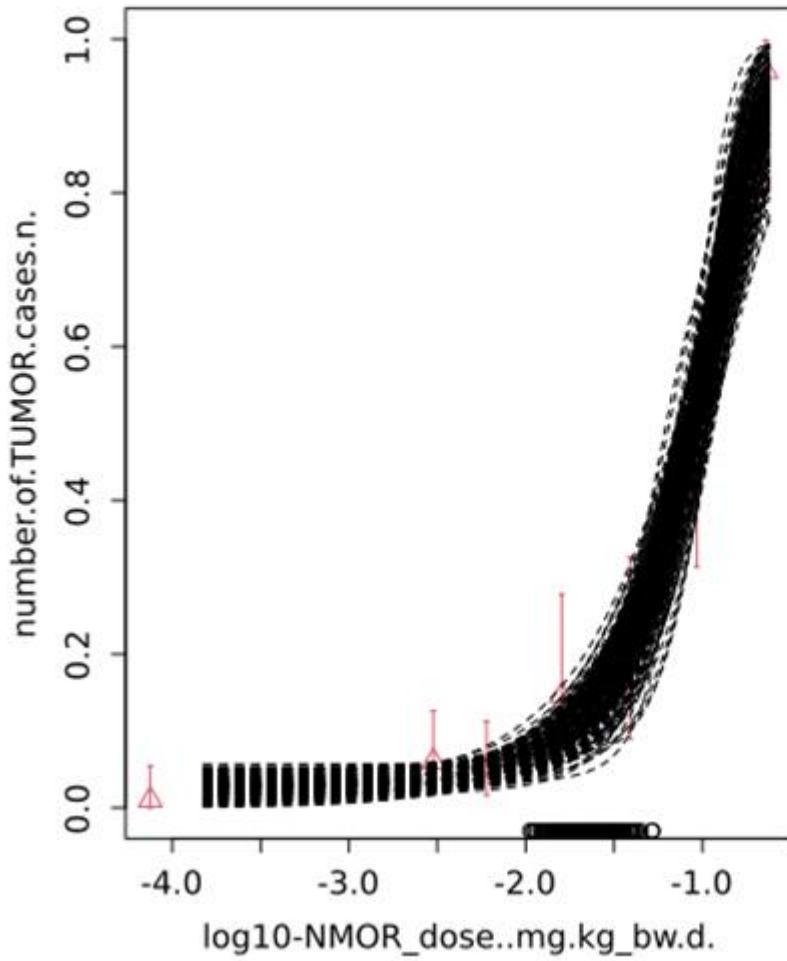

version: 70.0  
model averaging results  
dtype 4  
selected all  
dose scaling: 1  
conf level: 0.9  
number of runs: 200  
extra risk 0.1  
BMD CI  
0.014 0.0376

## B.4. NPYR

### Data Description

The endpoint to be analyzed is animal with any liver tumour.

| Data used for analysis: <b>NPYR</b><br><b>dose</b><br><b>mg/kg bw per day</b> | <b>Number of animals with</b><br><b>any liver tumour</b> | <b>Total number</b><br><b>of animals</b> |
|-------------------------------------------------------------------------------|----------------------------------------------------------|------------------------------------------|
| 0.000                                                                         | 3                                                        | 500                                      |
| 0.029                                                                         | 1                                                        | 80                                       |
| 0.095                                                                         | 4                                                        | 80                                       |
| 0.290                                                                         | 17                                                       | 80                                       |

### Results

Final BMD Values:

| subgroup | <b>BMDL</b> | <b>BMDU</b>  |
|----------|-------------|--------------|
| all      | <b>0.13</b> | <b>0.264</b> |

Confidence intervals for the BMD are based on 200 bootstrap data sets.

### Fitted Models

| model           | No.par | loglik  | AIC    | accepted | BMDL  | BMDU  | BMD   | conv |
|-----------------|--------|---------|--------|----------|-------|-------|-------|------|
| null            | 1      | -109.27 | 220.54 |          | NA    | NA    | NA    | NA   |
| full            | 4      | -80.98  | 169.96 |          | NA    | NA    | NA    | NA   |
| two.stage       | 3      | -81.00  | 168.00 | yes      | 0.120 | 0.228 | 0.177 | yes  |
| log.logist      | 3      | -80.98  | 167.96 | yes      | 0.117 | 0.223 | 0.168 | yes  |
| Weibull         | 3      | -80.98  | 167.96 | yes      | 0.120 | 0.225 | 0.170 | yes  |
| log.prob        | 3      | -80.99  | 167.98 | yes      | 0.111 | 0.216 | 0.159 | yes  |
| gamma           | 3      | -80.98  | 167.96 | yes      | 0.119 | 0.223 | 0.168 | yes  |
| LVM: Expon. m3- | 3      | -81.03  | 168.06 | yes      | 0.125 | 0.235 | 0.181 | yes  |
| LVM: Hill m3-   | 3      | -81.03  | 168.06 | yes      | 0.125 | 0.235 | 0.181 | yes  |

## **Estimated Model Parameters**

### **two.stage**

estimate for a- : 0.005901

estimate for BMD- : 0.1768

estimate for c : 27.08

### **log.logist**

estimate for a- : 0.005975

estimate for BMD- : 0.1675

estimate for c : 1.568

### **Weibull**

estimate for a- : 0.005957

estimate for BMD- : 0.1702

estimate for c : 1.493

### **log.prob**

estimate for a- : 0.006117

estimate for BMD- : 0.1593

estimate for c : 0.7714

### **gamma**

estimate for a- : 0.005977

estimate for BMD- : 0.1681

estimate for c : 1.608

### **EXP**

estimate for a- : 1.878

estimate for BMD- : 0.1806

estimate for d- : 0.6546

estimate for th(fixed) : 0

estimate for sigma(fixed) : 0.25

### **HILL**

estimate for a- : 1.878

estimate for BMD- : 0.1805

estimate for d- : 0.6568

estimate for th(fixed) : 0

estimate for sigma(fixed) : 0.25

**Weights for Model Averaging**

| two.stage | log.logist | Weibull | log.prob | gamma | EXP  | HILL |
|-----------|------------|---------|----------|-------|------|------|
| 0.14      | 0.15       | 0.15    | 0.14     | 0.15  | 0.14 | 0.14 |

### Visualization

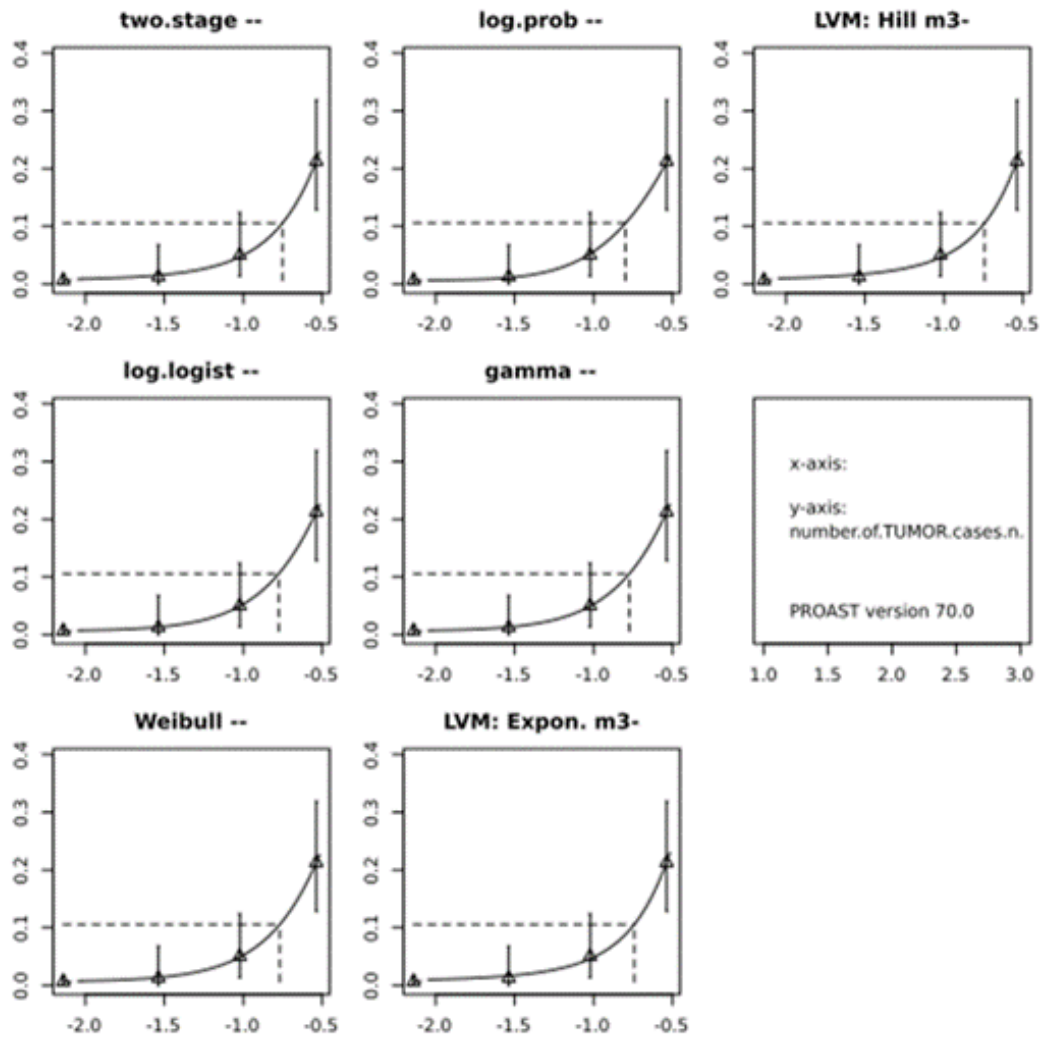

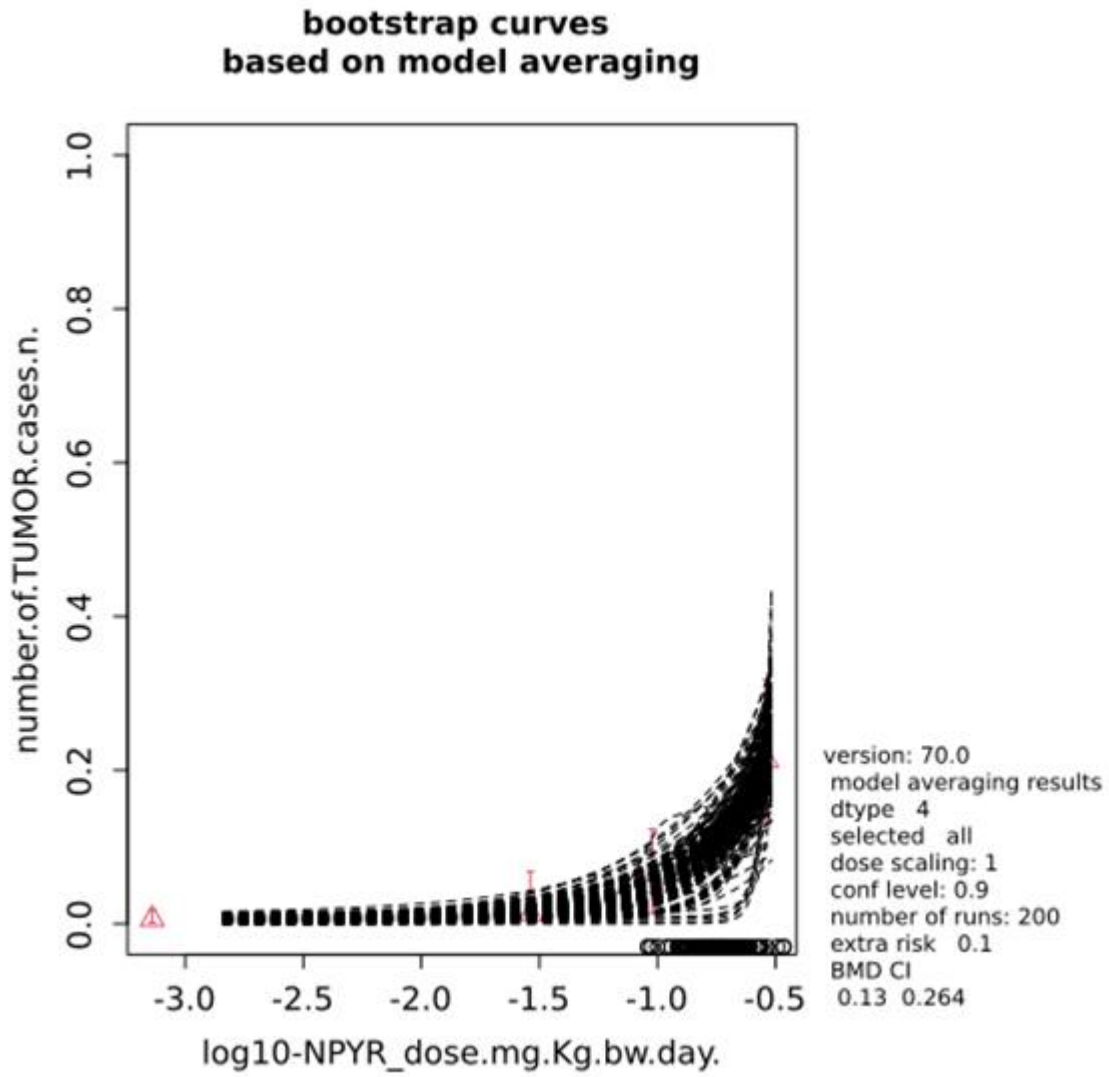

## B.5. NPIP

### A.1.1 Data Description

The endpoint to be analyzed is animal with any liver tumour.

Data used for analysis:

| <b>NPIP dose<br/>mg/kg bw per day</b> | <b>Number of animals with<br/>any liver tumour</b> | <b>Total number<br/>of animals</b> |
|---------------------------------------|----------------------------------------------------|------------------------------------|
| 0                                     | 0                                                  | 40                                 |
| 0.02                                  | 3                                                  | 78                                 |
| 0.09                                  | 6                                                  | 75                                 |
| 0.4                                   | 16                                                 | 34                                 |
| 2.1                                   | 11                                                 | 34                                 |

## Results

### Final BMD Values

| <b>subgroup</b> | <b>BMDL</b>  | <b>BMDU</b>  |
|-----------------|--------------|--------------|
| all             | <b>0.062</b> | <b>0.213</b> |

Confidence intervals for the BMD are based on 200 bootstrap data sets.

**Response variable: number.of.TUMOR.cases.n.**

### Fitted Models

| model           | No.par | loglik  | AIC    | accepted | BMDL   | BMDU  | BMD    | conv |
|-----------------|--------|---------|--------|----------|--------|-------|--------|------|
| null            | 1      | -104.71 | 211.42 |          | NA     | NA    | NA     | NA   |
| full            | 5      | -78.53  | 167.06 |          | NA     | NA    | NA     | NA   |
| two.stage       | 3      | -91.99  | 189.98 | no       | NA     | NA    | 0.3280 | yes  |
| log.logist      | 3      | -84.70  | 175.40 | no       | NA     | NA    | 0.0682 | yes  |
| Weibull         | 3      | -85.19  | 176.38 | no       | NA     | NA    | 0.0663 | yes  |
| log.prob        | 3      | -84.25  | 174.50 | no       | NA     | NA    | 0.0689 | yes  |
| gamma           | 3      | -85.56  | 177.12 | no       | NA     | NA    | 0.0664 | yes  |
| LVM: Expon. m5- | 4      | -80.46  | 168.92 | yes      | 0.0604 | 0.206 | 0.1110 | yes  |
| LVM: Hill m5-   | 4      | -80.65  | 169.30 | yes      | 0.0768 | 0.172 | 0.1060 | yes  |

## **Estimated Model Parameters**

### **two.stage**

estimate for a- : 0.04576

estimate for BMD- : 0.328

estimate for c : 1e-06

### **log.logist**

estimate for a- : 1e-06

estimate for BMD- : 0.0682

estimate for c : 0.5809

### **Weibull**

estimate for a- : 1e-06

estimate for BMD- : 0.06632

estimate for c : 0.4927

### **log.prob**

estimate for a- : 1e-06

estimate for BMD- : 0.06886

estimate for c : 0.3358

### **gamma**

estimate for a- : 1e-06

estimate for BMD- : 0.06643

estimate for c : 0.4366

### **EXP**

estimate for a- : 1.661

estimate for BMD- : 0.1112

estimate for c- : 0.6427

estimate for d- : 1.663



estimate for th(fixed) : 0

estimate for sigma(fixed) : 0.25

**HILL**

estimate for a- : 1.635

estimate for BMD- : 0.1064

estimate for c- : 0.6517

estimate for d- : 3.333

estimate for th(fixed) : 0

estimate for sigma(fixed) : 0.25

**Weights for Model Averaging**

two.stage log.logist Weibull log.prob gamma EXP HILL

---

0            0.02        0.01        0.03        0.01        0.51 0.42

**Visualization**

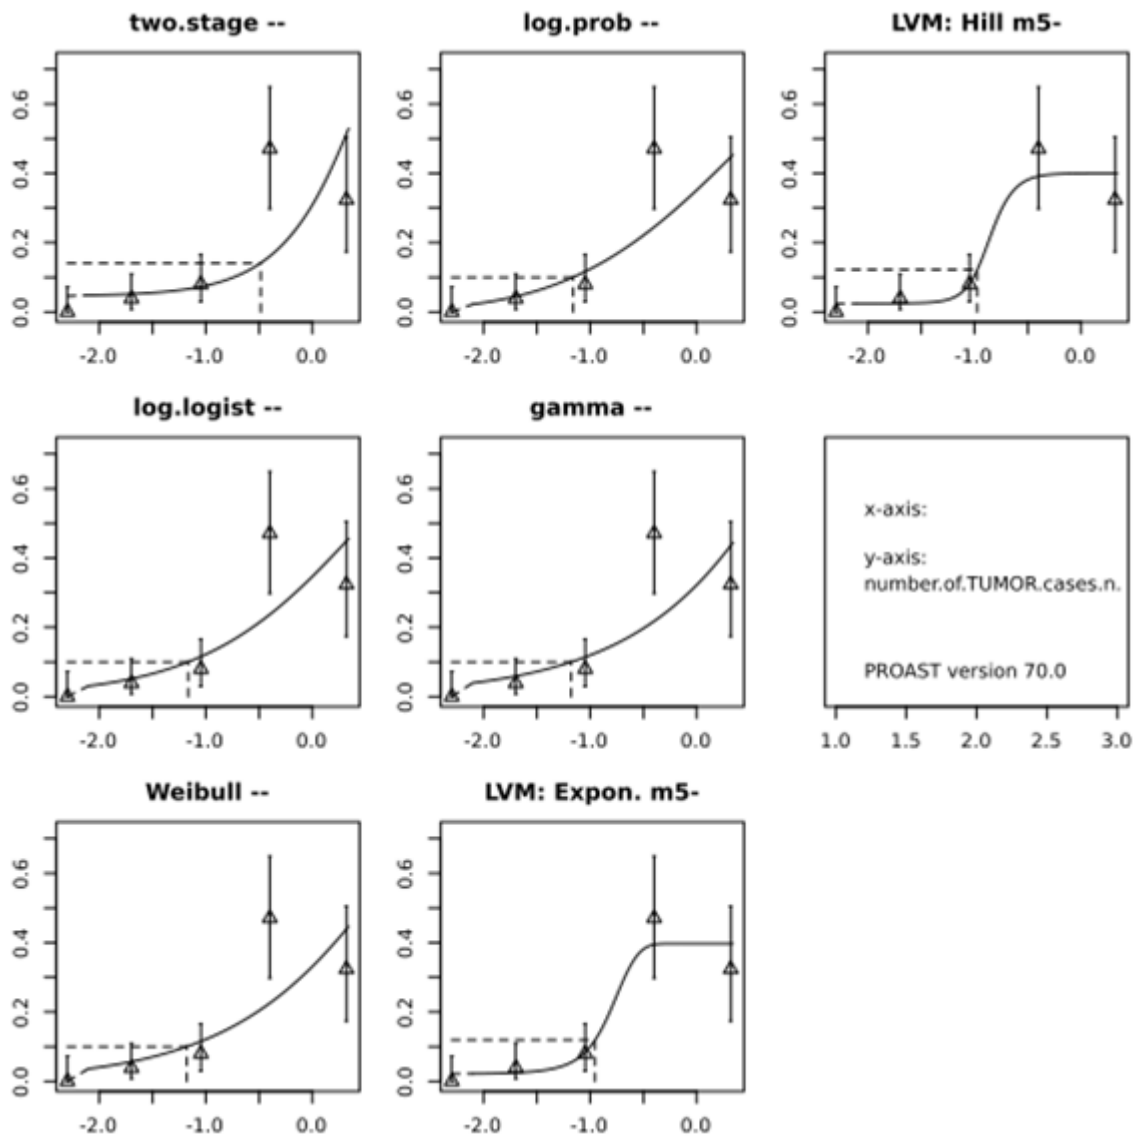

### bootstrap curves based on model averaging

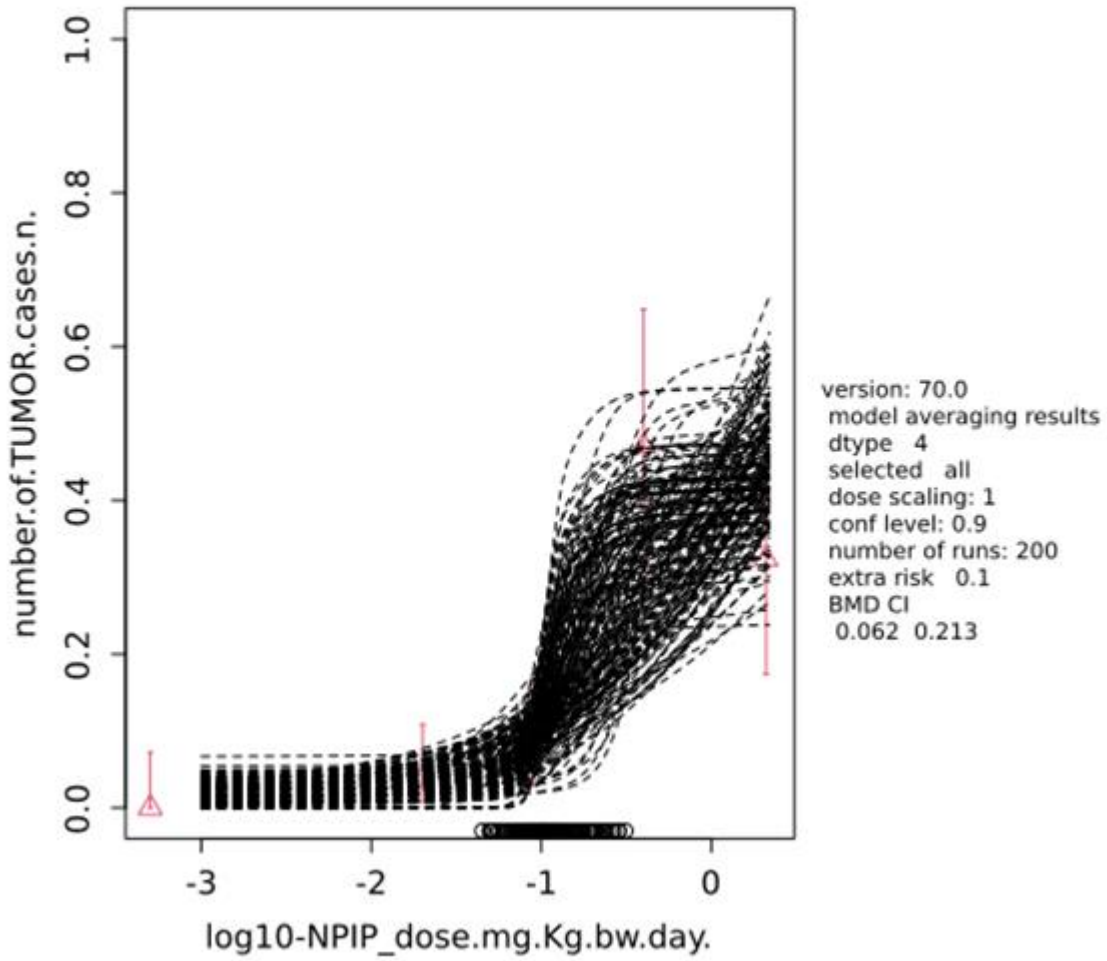

Supplement: EFS2-21-e07884-s003.pdf [file EFS2-21-e07884-s003.pdf]
