# Supplementary material for: Risk assessment of N‐nitrosamines in food
Source: PubMed Central journal article supplement (PMC10043641; doi:10.2903/j.efsa.2023.7884), 2023-03-28

Annex to: Risk assessment of N-nitrosamines in food. doi:10.2903/j.efsa.2023.7884

© 2023 Wiley-VCH Verlag GmbH & Co. KgaA on behalf of the European Food Safety Authority.

## Annex D – Prediction of TD50s for NMAMPA and NMAMBA by Read Across with the OECD QSAR Toolbox v 4.4

### NMAMPA

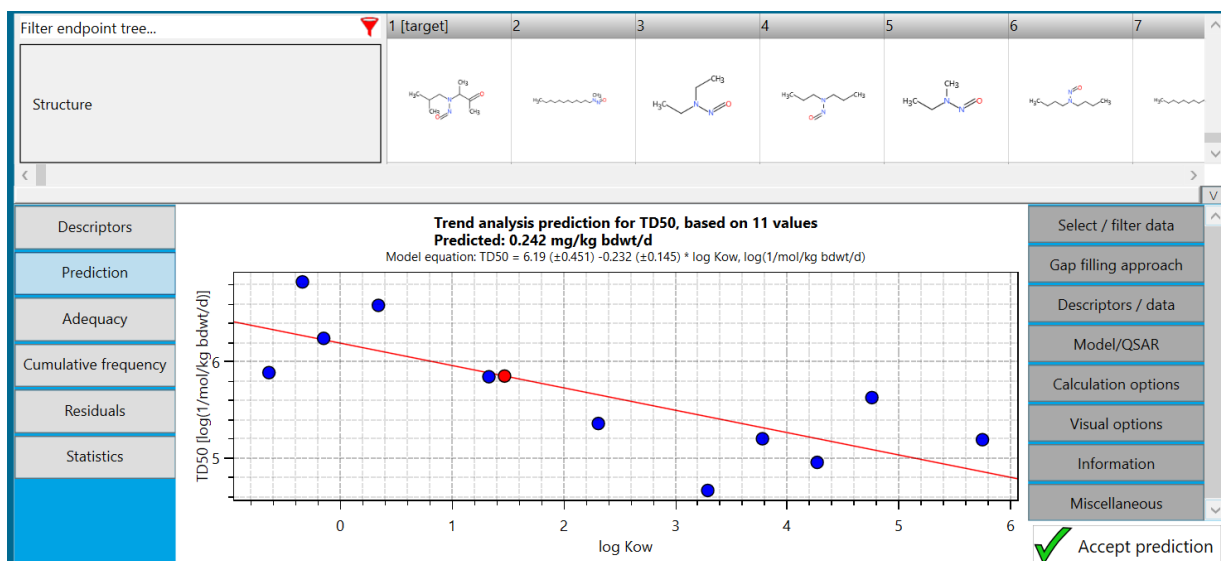

### NMAMPA

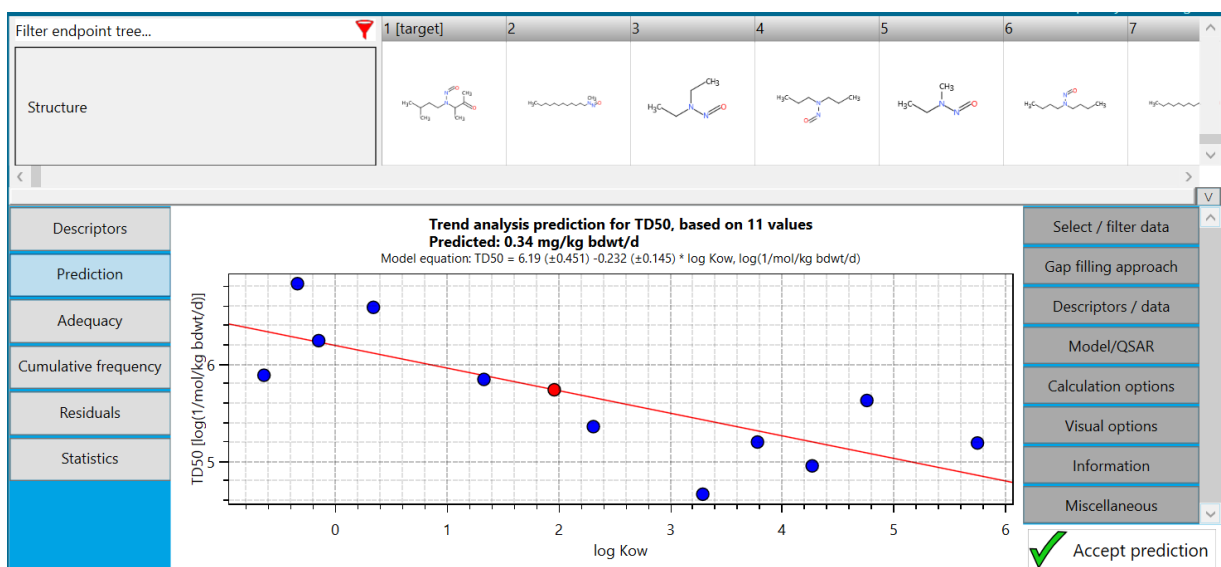

Supplement: EFS2-21-e07884-s005.pdf [file EFS2-21-e07884-s005.pdf]
